# Supplementary material
Source: PubMed Central journal article supplement (PMC6029087)
Supplement: AEM.00152-18_zam014188620s1.pdf [file AEM.00152-18_zam014188620s1.pdf]

**Fig. S2 Sequence alignment of CoMA and related enzymes.** The sequence of CoMA without the signal peptide was used. The protein sequence alignments were generated via the MUSCLE alignment in MEGA 7.0. Numbering of amino acid residues from the N-terminus of mature enzymes is shown on the right. The black boxes represent the seven conserved regions of  $\alpha$ -amylases (Region I-VII) and two conserved sequence regions which found only in the CD-/pullulan-degrading enzymes. The asterisks represent the invariant catalytic amino acids including Asp-328, Glu-357, and Asp-424 (ThMA numbering). The enzymes are: ThMA (PDB no. 1SMA), NPase (PDB no. 1J0K), BSMA (accession no. Q45490), CDase (PDB no. 1EA9), HOAMYA (PDB no. 1WZA), TAA (PDB no. 2TAA).

ThMA MRKEAIHRSIDNFAYAYDSEFLHLRLQTKKNDVDHVELLFGDPYEWHDGAWQFOTMPMRKTGSDGLFDYWLAEVKPPYR 80  
 NPase MRKEAIYHRPADNFAYAYDSEFLHLRLRQTKKDDIDRVELLHGDPYDQNGAWQFOMMPMRKTGSDGLFDYWFAEVKPPYR 80  
 BSMA MFKEAIYHRPKDNFAYAYDSEFLHLRLRQTKKNDVHVRLLYGDYFVWENGHWQVSYQSMQKSGTDELFDYWIAEIVPPYR 80  
 CDase MFEAVYHRPRKNSFYAYNGTIVHLRLRQTKKDDMTAVYALAGDKYVWDH---TMEYVPMTKLAIDELFDYWECEVTPPYR 77  
 HOAMYA -----  
 CoMA -----  
 TAA -----  
 ruler 1.....10.....20.....30.....40.....50.....60.....70.....80

ThMA RLRVGFVLRAGGEEKLVYTEKGFYHEAPSDDTAYYFCFPFLHRVDFLQAPDVKVDTVMYQIFPERFANGNPALSPKGRPW 160  
 NPase RLRVGFVLRAGGEEKLVYTEKGFYFVPTDDTAYYFCFPFLHRVDFLQAPDVKVDTVMYQIFPERFANGNPALSPKGRPW 160  
 BSMA RLRVGFELTSENEQIVYTEKGFYRQAPMDTAYYFCFPFLNKIDVFOAPEWVKDTIYQIFPERFANGNEALNPAGTLPLW 160  
 CDase RVKYGFLQLQCEKRWMTPEYDFLEPPAN-PRDLRFYFPFINEVDVFOPPAWVKDAIFYQIFPERFANGDTRNDPEGTPLW 156  
 HOAMYA -----BEKHCITYEIVVRSFYDSG---DGIGDL 26  
 CoMA -----PTESAPGNITLAAEAGDAWYRGAVFYEIVVRSFQDSNG---DGVGDL 70  
 TAA -----APPADWRSQSIIVFLITDRFARTDG---STH 27  
 ruler .....90.....100.....110.....120.....130.....140.....150.....160

ThMA GSEDPPTPSFFGGDLQGIIDHLDYLADLITGIYLLHIFRSP-----SNHKYDTADYFEIDPHFGDKEIKLTLVKRC 232  
 NPase GSEDPPTPSFFGGDLQGIIDHLDYLVDLGITGIYLLHIFRSP-----SNHKYDTADYFEVDPHFGDKEIKLTLIDRC 232  
 BSMA GSADPTPSFFGGDFEGIIQKLDHLVDLGVNGIYFPIFKAS-----SNHKYDTADYFEIDPQFGDKQIFKRLVELC 232  
 CDase GSADPTPSFFGGDLQGIIDHLDLHSLKLVNAVYFPIFKAT-----SNHKYDTADYFEIDPQFGDKQIFKRLVELC 228  
 HOAMYA KGLHEKLDYLNDDGPE---TADLGVNGLWLMPIFKSP-----SYHGVDVLDYKINPDYTDLEDHKLVEAA 91  
 CoMA QGLISRLDYLNDGNEPA---TDDLGVDAIWLWVEFASP-----SYHGVDVSDYERIQAYGSLDELQRLCDEA 135  
 TAA ATCNTADQKCGGAWOGLIDKLDYIQGMEETAIWIFVIAOLPQDCAYGDYHGYWQTDIYSLINENYGTADDLKLSSAL 107  
 ruler .....170.....180.....190.....200.....210.....220.....230.....240

Region VI

ThMA HEKGIRVMLDAVFNHSCGYEFAPFQDVLKNGAASRYKDWFHIREFPLOTEP-RPNYDT-----FAFVPHMPKL 298  
 NPase HEKGIRVMLDAVFNHSCGYEFAPFQDVKNGESSKYKDWFHIREFPLOTEP-RPNYDT-----FRFVPMQKL 298  
 BSMA HOKAIRVMLDAVFNHSCGYEFPFQDVLKNGENSKYKDWFHIREFPLOTEP-RPNYDT-----FAFTPMMPKL 298  
 CDase HERGIRVLLDAVFNHSGRTFPFQDVLKNGENSKYKDWFHIREFPLOTEP-RPNYDT-----FAFELMPKL 295  
 HOAMYA HORGIKVIIIDLPINHTSERHPWFLKASRD-KNSEYRDYVWAG--PDITKETKIDGGRVWHYSPTGMYYGVFWSGMPDL 168  
 CoMA HRRGMRVIIIDLVINHTSERHPWFLSKSS-ESAKRDWYQWRANPAWAQFDLYSQTNTHCQDTGMYGVFWSGMPDL 214  
 TAA HERGMVMDVVAVNHMGYDAGSSVDYVSKPSSQDYFHPFCFIQNYEDQTOVEDCWLG---DNTVSTPDL 176  
 ruler .....250.....260.....270.....280.....290.....300.....310.....320

Region I

Region V

ThMA NTAHPVVKRYLLDVAIYWIREFDIDGWRLLDVAN-----EIDHCFWREFRQAVKALKPDVYIIGEIWHDAMP 364  
 NPase NTAHPVVKRYLLDVAIYWIREFDIDGWRLLDVAN-----EIDHCFWREFRQAVKALKPDVYIIGEIWHDAMP 364  
 BSMA NTEHQEVKNYLLDVAIYWIREFDIDGWRLLDVAN-----EVDHCFWREFRQAVKTIKPDAYIIGEIWHDAMP 364  
 CDase NTEHQEVKNYLLDVAIYWIREFDIDGWRLLDVAN-----EVDHCFWREFRQAVKTIKPDAYIIGEIWHDAMP 364  
 HOAMYA NYNPPVQEKVIGIAKYWLKCG-VDGFRLDGAHIFPPP-----AVYDKMSTWVEKFRCEIEVKP-VYLVGEVHWSIET 240  
 CoMA NITQIAVRKNEVRLALNLQRC-VDGFRLDAAEYLLIETGGGAGQADPEEFAFWKKEFAAHVRSVKPDVLYGEAWSETPS 293  
 TAA DITKDVVKNEDYDNGSVSNYSIDGLRDTVK-----HVCDFWEGYKKAAG---VYCIGEVLDGPA 237  
 ruler .....330.....340.....350.....360.....370.....380.....390.....400

Region II

Region III

ThMA WLRGDC--FDAVMN-----YPTADAALRFFAKEDMSASEFADRLMHVLHSPKQVN---EAAFNLLGSHDTPRLLIV 431  
 NPase WLRGDC--FDAVMN-----YPTDGLVLRFFAKEETSAARQFANQMMHVLHSPNNVN---EAAFNLLGSHDTSRILIV 431  
 BSMA WLRGDC--FDAVMN-----YPTINGLRFRAQEFIRASQVFGMMTHVLHSPTNVN---EAFNLLGSHDTPRLLIL 431  
 CDase WLRGDC--FDAVMN-----YPTINAVLDFFIHQADAEKFSMLGKQLAGYPRQNS---EVMFNLLGSHDTPRLLIQ 428  
 HOAMYA VAPYFK--VGFDS-----TFNFKLAEAVIATAKAGFPFGFNKKAHXYGV-DREVGFNGYIDAPPLTNDHONRILLQ 310  
 CoMA VAKYKQ--SATVFGGDELPLNPFMSARVIEGYNAGNSGGVASKLLEMKNYPAGV---ADAPPLTNDHMRRLAQ 366  
 TAA YTCFYQNVMDGVLN-----YPLIYPIILNARKSKSSGSDDYNNMINTVKSDQDPSLLG---TFVENHNDPRFASY 304  
 ruler .....410.....420.....430.....440.....450.....460.....470.....480

Region IV

ThMA CGGDVRKVKLLFLFQLTFTGSPCIYYGDEIGMTGGND---PECRKCMVWD-----PEK 481  
 NPase CGGDVRKVKLLFLFQLTFTGSPCIYYGDEIGMTGGND---PECRKCMVWD-----PMQ 481  
 BSMA CREEDVRKAKLSFLFQLSFTGSPCIYYGDEIGMTGGND---PGCRKMIWD-----EHQ 481  
 CDase ADGDKRKMKLAFLFQFTYFTGSPCIYYGDEIVGLDGGHD---PGCRKMEWD-----ETK 478  
 HOAMYA LGQDRNKARVAASLYLTLPGNPFIIYGEIGMRGQCP---HEVIREPEPQWVNGSGEGETIYWEPMYNDG---FLSVEQEEK 385  
 CoMA FSNDAKALGLAAAVLLTLFGAPFLIYGEVGLGNGANNDESKRTMPWSAAAGGGFTTGSWPWYAFSGGRELVANVESQR 446  
 TAA LN-DIAAKNVAAFIILNDGFLPIIYAGQOHHVAGGND---PANREAWLS-----GYF 353  
 ruler .....490.....500.....510.....520.....530.....540.....550.....560

Region VII

ThMA QNKELHYHVQKLIARLKOYRSLR-RGDVAFLTADDEVN-HLVYAKIDGNETVMIIINRSNEAAEIP-MPLDARGKWLVLN 558  
 NPase QNKELHQHVQKLIARLKOYRSLR-RGEISFLHADDEMN-HLYYKKTIDGDETVLVIINRSDQKADIP-IPLDARGTWLVLN 558  
 BSMA QNRQLFRHVQKLIARLKAAYKAFNRGNLHFIDANDET-NHLIYKKTIDGDEEAILVLVNNNEQEIET-LPLSLKGLLTLN 559  
 CDase HDKDLFAFYQTVIRLRQAHAALR-TGTQKFLTAEKNSR-QIAYTREDDDQTLVVMN--NDKAGET-LTLPVRFHQVTHL 553  
 HOAMYA NQDSLNNHYRRLIHFERNENPVFY-TGKTEIING--GLN-VVAFRRYNDKRDLYVHNLVNRVVKIK---VASGNWTLF 457  
 CoMA NPSLLSRYRNLIFARQSEALR-NGGLRLFTATTGMSRTLAFVRLGDQOVLVIHNESTAQESVGPDDVEATLAEPLFL 525  
 TAA TDSLEYKLIASANAIRN-YAISKDTGCFVYKPYKDDTTIARRKTGTDGQIVLILSNKQASGDSYTLSSLSGASTAGCQ 432  
 ruler .....570.....580.....590.....600.....610.....620.....630.....640

ThMA LTG---ERFAAEAE---TLCVSLPPYGFVLYAVESW----- 588  
 NPase LTG---ERFAAEAE---TLCTSLPPYGFVLYAIEHW----- 588  
 BSMA WTN---EQFSAEAD---TLKSTLPPYGFVLYKIEDWL----- 590  
 CDase WOD---DVLTAAGC---QLTVKLPAYGFVLYKASSD----- 583  
 HOAMYA NSGKEIITPVEDNN---KLMYIIPAYTIVLEKE----- 488  
 CoMA DSG---VAPLGGTC---AKKTSIPARSIGIWRLR----- 554  
 TAA LTEVIGCTTVVVGSDGNVPPVPMAGCLPRVLYPTEKLAGSKICSDSS 478  
 ruler .....650.....660.....670.....680.....

**Fig. S3 Inhibition of CoMA amylase activity by acarbose.** Action of CoMA on acarbose, soluble starch and a mixture of acarbose and soluble starch in 20 mM Tris-HCl (pH 7.0) at 30°C for up to 12 h. Acb, acarbose; M, maltooligosaccharide standards; G1 to G3, glucose to maltotriose.

**Fig. S3**

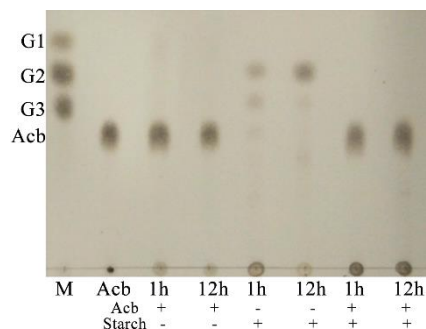

**Table S1 The activity location of the expressed CoMA in *E. coli*.**

| Location                                    | Resting cell | Crude lysate | Culture supernatant |
|---------------------------------------------|--------------|--------------|---------------------|
| Activity <sup>a</sup> (U.mL <sup>-1</sup> ) | 76.3±7.1     | 80.8±10.3    | ND <sup>b</sup>     |

<sup>a</sup> The recombinant *E. coli* BL21(DE3) cells harboring the pET29a-coMA (500 mL) after induced were harvested by centrifugation and resuspended in an equilibration buffer (20 mL). This cells were cut into two parts. One part was set as resting cell; and the other was sonicated and set as crude lysate. The culture supernatant of recombinant *E. coli* BL21(DE3) was concentrated to 20 mL using ultrafiltration columns. The activity of these were measured for 10 min under standard conditions and recombinant *E. coli* BL21 with pET29a(+) was used as control.

<sup>b</sup> ND, no activity detected.
